# Supplementary material
Source: PubMed Central journal article supplement (PMC7582230)

## Supplemental Online Content

Sonbol MB, Riaz IB, Naqvi SAA, et al. Systemic therapy and sequencing options in advanced hepatocellular carcinoma: and network meta-analysis. *JAMA Oncol*. Published online October 22, 2020. doi:10.1001/jamaoncol.2020.4930

### **eMethods.** Search Strategy

**eTable1.** Baseline characteristics for patients included in the first-line trials

**eTable2.** Baseline characteristics for patients included in the second-line trials

**eFigure 1.** Network plot for overall-survival (left) and progression-free survival (right) for first-line trials: The thickness of the connecting line corresponds to the number of trials between comparators. AteBev: atezolizumab and bevacizumab

**eFigure 2.** Ranking of 1st line treatments for overall survival

**eFigure 3.** Ranking of 1st line treatments for progression-free survival

**eTable 3. A.** Ranking of first-line treatments for overall survival (left) and progression-free survival (right) based on P-score

**eFigure 4.** Risk of bias graph for first-line studies: review authors' judgements about each risk of bias item presented as percentages across all included studies

**eTable 4.** GRADE

**eFigure 5.** Network plot for overall-survival (left) and progression-free survival (right) for second-line trials: The thickness of the connecting line corresponds to the number of trials between comparators

**eTable 5.** Ranking of second-line treatments for overall survival (left) and progression-free survival (right) based on P-score

**eFigure 6.** Ranking of 2nd line treatments for overall survival

**eFigure 7.** Ranking of 2nd line treatments for progression-free survival

**eFigure 8.** Network plot for AFP $\geq$  400 subgroup analysis: The thickness of the connecting line corresponds to the number of trials between comparators

**eTable 6.** League table showing indirect comparisons among AFP $\geq$  400 subgroup analysis

**eTable 7.** Ranking of AFP $\geq$  400 subgroup analysis for overall survival (left) and progression-free survival (right) based on P-score

**eFigure9.** Ranking of AFP $\geq$  400 subgroup analysis for overall survival

**eFigure10.** Ranking of AFP $\geq$  400 subgroup analysis for progression-free survival

**eFigure11.** Risk of bias graph for second-line trials: review authors' judgements about each risk of bias item presented as percentages across all included studies

**eTable 8A.** Certainty of Evidence Table (GRADE). Second line treatment – Overall **survival**

**eFigure 12.** Forest plot of Frequentist network meta-analysis using random-effects model for overall survival (OS) (left) and progression-free survival (PFS) (right) in 1st line of treatment

**eFigure 13.** Figure showing forest plot of Frequentist network meta-analysis using random-effects model for overall survival (OS) (left) and progression-free survival (PFS) (right) in 2nd line of treatment

**eFigure 14.** Figure showing forest plot of Frequentist network meta-analysis using random-effects model for overall survival (OS) (left) and progression free survival (PFS) (right) in 2nd line of treatment for subgroup  $\geq$ 400 AFP

This supplemental material has been provided by the authors to give readers additional information about their work.

## eMethods: Search Strategy

**3.9.20 PubMed (884)** (((((((((((((((("Carcinoma, Hepatocellular/drug therapy"[Mesh]) OR "Liver Neoplasms/drug therapy"[Mesh]) OR "metastatic liver cancer") OR "advanced liver cancer") OR "advanced hepatocellular carcinoma") OR "metastatic hepatocellular carcinoma") OR ("metastatic HCC" OR "advanced HCC")))) OR "Carcinoma, Hepatocellular"[Mesh]) OR "Liver Neoplasms"[Mesh])) AND (((((((("Antineoplastic Agents" [Pharmacological Action]) OR "Protein Kinase Inhibitors" [Pharmacological Action]) OR "Protein Kinase Inhibitors"[Mesh]) OR "Immunotherapy"[Mesh]) OR "Placebos"[Mesh]) OR "Drug Therapy"[Mesh]) OR "drug therapy" [Subheading])) OR (antineoplastic\* OR "kinase inhibitor" OR TKI OR placebo\*)) AND (advanced [tiab] OR unresectable [tiab] OR metastas\* [tiab] OR metastat\* [tiab])) AND (((("Mortality"[Mesh] OR "Survival"[Mesh] OR "mortality" [Subheading] OR "Survival Analysis"[Mesh] OR "Survival Rate"[Mesh] OR "Progression-Free Survival"[Mesh])) OR "Treatment Outcome"[Mesh])) AND Clinical Trial, Phase III[ptyp]) OR (((((((((((((((("Carcinoma, Hepatocellular/drug therapy"[Mesh]) OR "Liver Neoplasms/drug therapy"[Mesh]) OR "metastatic liver cancer") OR "advanced liver cancer") OR "advanced hepatocellular carcinoma") OR "metastatic hepatocellular carcinoma") OR ("metastatic HCC" OR "advanced HCC")))) OR "Carcinoma, Hepatocellular"[Mesh]) OR "Liver Neoplasms"[Mesh])) AND (((((((("Antineoplastic Agents" [Pharmacological Action]) OR "Protein Kinase Inhibitors" [Pharmacological Action]) OR "Protein Kinase Inhibitors"[Mesh]) OR "Immunotherapy"[Mesh]) OR "Placebos"[Mesh]) OR "Drug Therapy"[Mesh]) OR "drug therapy" [Subheading])) OR (antineoplastic\* OR "kinase inhibitor" OR TKI OR placebo\*)) AND (advanced [tiab] OR unresectable [tiab] OR metastas\* [tiab] OR metastat\* [tiab])) AND (((("Mortality"[Mesh] OR "Survival"[Mesh] OR "mortality" [Subheading] OR "Survival Analysis"[Mesh] OR "Survival Rate"[Mesh] OR "Progression-Free Survival"[Mesh])) OR "Treatment Outcome"[Mesh])) AND (first-line [tiab] OR second-line OR phase 3 OR phase III)) Filters: English

### 3.9.20 Embase <1974 to 2020 March 05> Search Strategy

- 1 exp liver cell carcinoma/dt [Drug Therapy] (19997)
- 2 exp liver cell carcinoma/ (150324)
- 3 liver tumor/ (47639)
- 4 exp liver tumor/dt [Drug Therapy] (36718)
- 5 exp liver tumor/ (271624)
- 6 "metastatic liver cancer".mp. (774)
- 7 "advanced hepatocellular carcinoma".mp. (4263)
- 8 "advanced liver cancer".mp. (207)
- 9 "metastatic hepatocellular carcinoma".mp. (655)
- 10 ("metastatic HCC" or "advanced HCC").mp. [mp=title, abstract, heading word, drug trade name, original title, device manufacturer, drug manufacturer, device trade name, keyword, floating subheading word, candidate term word] (5097)
- 11 1 or 2 or 3 or 4 or 5 or 6 or 7 or 8 or 9 or 10 (272148)
- 12 exp antineoplastic agent/ (2176079)
- 13 exp protein kinase inhibitor/ (528060)
- 14 exp immunotherapy/ (210424)
- 15 exp placebo/ (347388)
- 16 exp drug therapy/ (2744031)
- 17 (antineoplastic\* or "kinase inhibitor" or TKI or placebo\*).mp. [mp=title, abstract, heading word, drug trade name, original title, device manufacturer, drug manufacturer, device trade name, keyword, floating subheading word, candidate term word] (1022721)
- 18 12 or 13 or 14 or 15 or 16 or 17 (4632164)
- 19 advanced.ti. or advanced.ab. or unresectable.ti. or unresectable.ab. or metastas\*.ti. or metastas\*.ab. (1066581)
- 20 (first-line or second-line).mp. [mp=title, abstract, heading word, drug trade name, original title, device manufacturer, drug manufacturer, device trade name, keyword, floating subheading word, candidate term word] (158079)

- 21 exp survival/ or exp progression free survival/ or exp survival analysis/ or exp survival rate/ (1097914)
- 22 exp mortality/ (1045813)
- 23 exp treatment outcome/ (1617063)
- 24 21 or 22 or 23 (3196327)
- 25 11 and 19 (84926)
- 26 18 and 25 (42174)
- 27 24 and 26 (23155)
- 28 20 and 27 (2482)
- 29 ("phase III" or "phase 3").mp. [mp=title, abstract, heading word, drug trade name, original title, device manufacturer, drug manufacturer, device trade name, keyword, floating subheading word, candidate term word] (132222)
- 30 28 and 29 (457)
- 31 limit 27 to phase 3 clinical trial (537)
- 32 30 or 31 (796)
- 33 limit 32 to english language (784)

**3.9.20 Scopus (543)** ( ( ( ( TITLE-ABS-KEY ( "hepatocellular carcinoma" OR "advanced hepatocellular carcinoma" OR "metastatic hepatocellular carcinoma" OR "metastatic HCC" OR "advanced HCC" ) OR TITLE-ABS-KEY ( "advanced liver cancer" OR "metastatic liver cancer" ) ) ) ) AND ( TITLE-ABS-KEY ( antineoplastic OR "protein Kinase inhibitors" OR pki OR immunotherapy OR placebo\* ) ) ) AND ( TITLE-ABS-KEY ( "survival rate" OR mortality OR "progression-free survival" OR "treatment outcome" ) ) ) AND ( ( TITLE-ABS-KEY ( "phase III" OR "phase 3" ) ) OR ( TITLE-ABS-KEY ( first-line OR second-line ) ) ) ) AND ( LIMIT-TO ( LANGUAGE , "English" ) ) )

**3.9.20 Web of Science (102)** TOPIC: ("hepatocellular carcinoma" OR "advanced hepatocellular carcinoma" OR "metastatic hepatocellular carcinoma" OR "metastatic HCC" OR "advanced HCC") OR TOPIC: ("advanced liver cancer" OR "metastatic liver cancer") AND TOPIC: (antineoplastic OR "protein Kinase inhibitors" OR pki OR immunotherapy OR placebo\*) AND TOPIC: ("survival rate" OR mortality OR "progression-free survival" OR "treatment outcome") AND TOPIC: ("phase III" OR "phase 3") OR TOPIC: (first-line OR second-line) Refined by: LANGUAGES: ( ENGLISH ) Indexes=SCI-EXPANDED, ESCI Timespan=All years

### **3.9.20 EBM Reviews - Cochrane Database of Systematic Reviews <2005 to March 4, 2020> Search Strategy (14)**

- 1 hepatocellular carcinoma.mp. [mp=title, short title, abstract, full text, keywords, caption text] (171)
- 2 (unresectable or metastas\* or metastat\* or advanced).mp. [mp=title, short title, abstract, full text, keywords, caption text] (2164)
- 3 1 and 2 (87)
- 4 (antineoplastic\* or PKI or protein kinase inhibitors or placebo).mp. [mp=title, short title, abstract, full text, keywords, caption text] (6789)
- 5 (first-line or second-line or "phase 3" or "phase III").mp. [mp=title, short title, abstract, full text, keywords, caption text] (2137)
- 6 3 and 4 (61)
- 7 5 and 6 (14)

**Clinical Trials (16)** Hepatocellular Carcinoma Metastatic OR hepatocellular carcinoma unresectable AND antineoplastic\* OR immunotherapy OR protein kinase inhibitor\* AND phase 3

**Author supplied (3)**

| DATABASE                                | RESULTS | DUPLICATES | REMAINING |
|-----------------------------------------|---------|------------|-----------|
| PubMed                                  | 884     | 91         | 793       |
| Embase                                  | 784     | 65         | 719       |
| Scopus                                  | 543     | 244        | 299       |
| Web of Science                          | 102     | 46         | 56        |
| Cochrane Database of Systematic Reviews | 14      | 0          | 14        |
| ClinicalTrials.gov                      | 16      | 0          | 16        |
| Author supplied                         | 3       | 0          | 3         |
| <b>TOTAL</b>                            | 2346    | 446        | 1900      |

| Study Name                             | Arm        | # pts | ECOG PS (0,1,2)%             | Median Age (Range) | Race/Region %                                                          | Sex (male %) | Child Pugh Score    |
|----------------------------------------|------------|-------|------------------------------|--------------------|------------------------------------------------------------------------|--------------|---------------------|
| <b>Cheng 2019 (IMBRAVE); Finn 2020</b> | Atezo+Bev  | 336   | 0 (62%), 1 (38%)             | 64 (26-88)         | White (37%), Asian (56%)                                               | 82           | A (99%), B (1%)     |
|                                        | Sorafenib  | 165   | 0 (62%), 1 (38%)             | 66 (33-87)         | White (32%), Asian (58%)                                               | 83           | A (100%)            |
| <b>Yau 2019 (CheckMate459)</b>         | Nivolumab  | 371   |                              |                    |                                                                        |              | NR                  |
|                                        | Sorafenib  | 372   |                              |                    |                                                                        |              | NR                  |
| <b>Kudo 2018</b>                       | Lenvatinib | 478   | 0 (64%), 1 (36%)             | 63 (20-88)         | White (28%), Asian (70%), Other (2%)                                   | 85           | A (99%), B (1%)     |
|                                        | Sorafenib  | 476   | 0 (63%), 1 (37%)             | 62 (22-88)         | White (30%), Asian (68%), Other (2%)                                   | 84           | A (99%), B (1%)     |
| <b>Cheng 2013 (Sunitinib)</b>          | Sunitinib  | 530   | 0 (52.5%), 1 (46.8%)         | 59 (18-85)         | White (20.9%), Black (1.1%), Asian (77.5%), Other 0.4%                 | 82.3         | A (99.8%)           |
|                                        | Sorafenib  | 544   | 0 (52.9%), 1 (46.7%)         | 59 (18-84)         | White (20.6%), Black (1.8%), Asian (76.8%), Other (0.7%)               | 84.4         | A (99.4%)           |
| <b>Cainap 2013</b>                     | Linifanib  | 514   | 0, 62.8%, 1, 37.2%           | 59 (21-84)         | Outside Asia 34 %, Asian 66.6%                                         | 86.4         | A (93.2%), B (5.8%) |
|                                        | Sorafenib  | 521   | 0, 66.2%, 1, 33.8%           | 60 (23-87)         | Outside Asia 32.8 %, Asian 67.2                                        | 83.7         | A (95%), B (5%)     |
| <b>Johnson 2013</b>                    | Brivanib   | 577   | 0, 64%, 1, 36%               | 61 (19-87)         | Asia (60%), Europe (23%), America (15%), other (2%)                    | 84           | A (92%), B (8%)     |
|                                        | Sorafenib  | 578   | 0, 61%, 1, 39%               | 60 (25-89)         | Asia (64%), Europe (23%), America (11%), other (1%)                    | 84           | A (92%), B (8%)     |
| <b>Cheng 2009 Asian Sharp</b>          | Sorafenib  | 150   | 0, 25.3 %, 1, 69.3%, 2, 5.3% | 51 (23-86)         | Asian                                                                  | 84.7         | A (97.3%), B (2.7%) |
|                                        | Placebo    | 76    | 0, 27.6%, 1, 67.1 %, 2, 5.3% | 52 (25-79)         | Asian                                                                  | 86.8         | A (97.4%), B (2.6%) |
| <b>Liovett 2007 Sharp</b>              | Sorafenib  | 299   | 0, 54%, 1, 38%, 2, 8%        | mean: 64.9 ± 11.2  | Europe/Australasia 88%, North America 9%, Central and South America 3% | 87           | A (95%), B (5%)     |
|                                        | Placebo    | 303   | 0, 54%, 1, 39%, 2, 7%        | mean: 66.3 ± 10.2  | Europe/Australasia 87%, North                                          | 87           | A (98%), B (2%)     |

|  |  |  |  |  |                                                 |  |  |
|--|--|--|--|--|-------------------------------------------------|--|--|
|  |  |  |  |  | America 10%,<br>Central and South<br>America 4% |  |  |
|--|--|--|--|--|-------------------------------------------------|--|--|

**eTable 1: Baseline characteristics for patients included in the first-line trials**

**eTable2: Baseline characteristics for patients included in the second-line trials**

|                       | Arm                         | # pts | ECOG PS (0,1,2)%                    | Median Age (Range) | Race %                                                                                    | Sex (male %) | Child Pugh Score               |
|-----------------------|-----------------------------|-------|-------------------------------------|--------------------|-------------------------------------------------------------------------------------------|--------------|--------------------------------|
| <b>Finn 2020</b>      | <b><i>Pembrolizumab</i></b> | 278   | 0 (58.3%), 1 (41.7%)                | 67 (18-91)         | Asian w/o Japan (24.1%), European Union (34.5%), Japan (14.4%), USA (7.6%), Other (19.4%) | 226 (81.3)   | A5(63.3%), A6(36.3%), B7(0.4%) |
|                       | <b><i>Placebo</i></b>       | 135   | 0 (52.6%), 1(47.4%)                 | 65 (23-89)         | Asian w/o Japan (23%), European Union (31.9%), Japan (14.1%), USA (11.9%), Other (19.3%)  | 112 (83)     | A5(63.7%), A6(34.8%), B7(1.5%) |
| <b>BRUIX 2018</b>     | <b><i>Regorafenib</i></b>   | 379   | 0: 247 (65), 1: 132 (35)            | 64 (54-71)         | White: 138 (36), Asian: 156 (41), Black: 6 (2), Other/NR: 79 (21)                         | 88%          | A (98%), B (1%)                |
|                       | <b><i>Placebo</i></b>       | 194   | 0: 130 (67), 1: 64 (33)             | 62 (55-68)         | White: 68 (35), Asian: 78 (40), Black: 2 (1), Other/NR: 46 (24)                           | 88%          | A (97%), B (3%)                |
| <b>AbuAlfa2018</b>    | <b><i>cabozantinib</i></b>  | 470   | (0) 52%, (1) 48%, (2) <1%           | 64 (22-86)         | Asian: 159 (34%), Non-Asian: 280 (60%), Other 31 (6%)                                     | 81%          | A (98%), B (1%)                |
|                       | <b><i>Placebo</i></b>       | 237   | (0) 55%, (1) 45%, (2) 0             | 64 (24-86)         | Asian: 82 (35%), Non-Asian: 143 (60%), Other 12(5%)                                       | 85%          | A (99%), B (1%)                |
| <b>REACH Zhu 2015</b> | <b><i>Ramucirumab</i></b>   | 283   | 0: 159 (56), 1: 124 (44)            | 64 (28-87)         | White: 139 (49), Asian: 131 (46), Other: 13 (5)                                           | 236 (83)     | Child Pugh A (98%)             |
|                       | <b><i>Placebo</i></b>       | 282   | 0: 153 (54), 1: 129 (46)            | 62 (25-85)         | White: 137 (49), Asian: 135 (48), Other: 10 (4)                                           | 242 (86)     | Child Pugh A (98%)             |
| <b>Liovet 2013</b>    | <b><i>Brivanib</i></b>      | 263   | 0: 151 (57), 1: 102 (39), 2: 10 (4) | 64 (19-89)         | White: 122 (46), Asian: 125 (48), Black/African American 10 (4), other: 6 (2)             | 216 (82)     | A (92%), B (7%), (1%)          |
|                       | <b><i>Placebo</i></b>       | 132   | 0: 81 (61), 1: 46 (35), 2: 5 (4)    | 62 (19-87)         | White: 66 (50), Asian: 59 (45), Black/African American 6 (5), other: 1 (1)                | 113 (86)     | A (91%), B (9%)                |

**eFigure 1: Network plot for overall-survival (left) and progression-free survival (right) for first-line trials: The thickness of the connecting line corresponds to the number of trials between comparators. AteBev: atezolizumab and bevacizumab.**

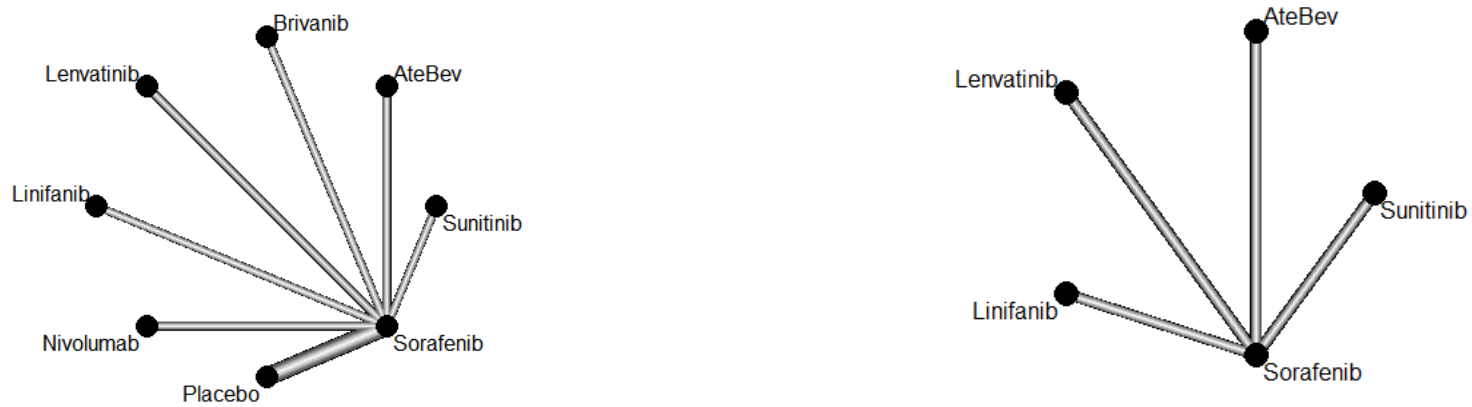



**eFigure 2: Ranking of 1<sup>st</sup> line treatments for overall survival.**

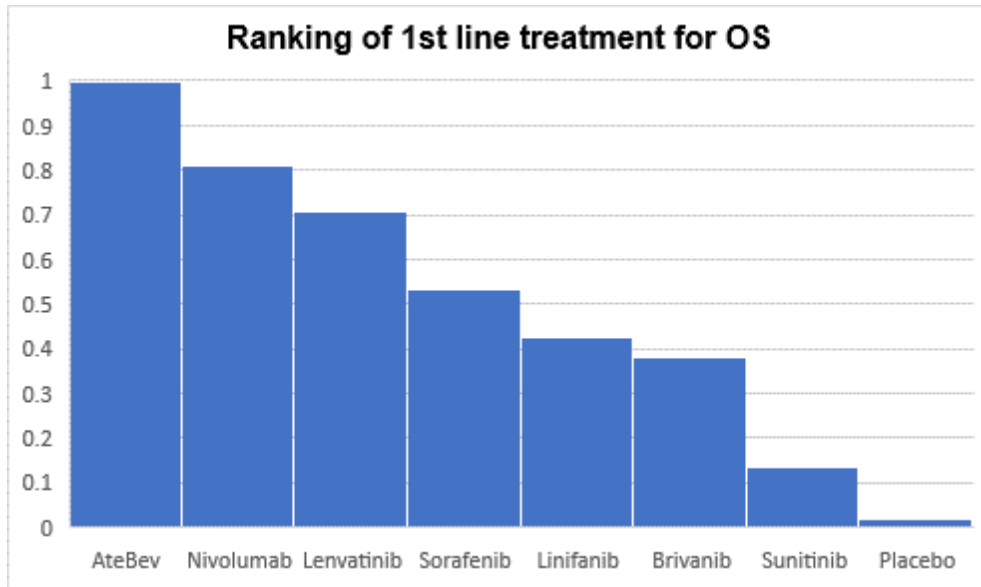

**eFigure 3: Ranking of 1<sup>st</sup> line treatments for progression-free survival.**

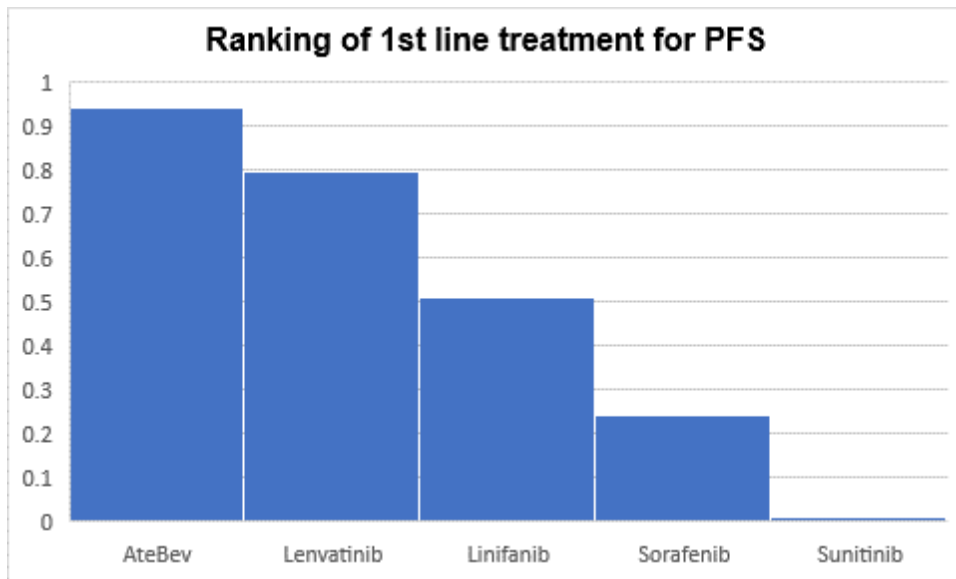

**eTable 3: A. Ranking of first-line treatments for overall survival (left) and progression-free survival (right) based on P-score.**

| Ranking - OS       |         | Ranking - PFS      |         |
|--------------------|---------|--------------------|---------|
| 1st line treatment | P-score | 1st line treatment | P-score |
| AteBev             | 0.9965  | AteBev             | 0.9416  |
| Nivolumab          | 0.8115  | Lenvatinib         | 0.7971  |
| Lenvatinib         | 0.705   | Linifanib          | 0.5102  |
| Sorafenib          | 0.5343  | Sorafenib          | 0.241   |
| Linifanib          | 0.423   | Sunitinib          | 0.01    |
| Brivanib           | 0.379   |                    |         |
| Sunitinib          | 0.1318  |                    |         |
| Placebo            | 0.0181  |                    |         |

## eFigure 4

Risk of bias graph for first-line studies: review authors' judgements about each risk of bias item presented as percentages across all included studies.

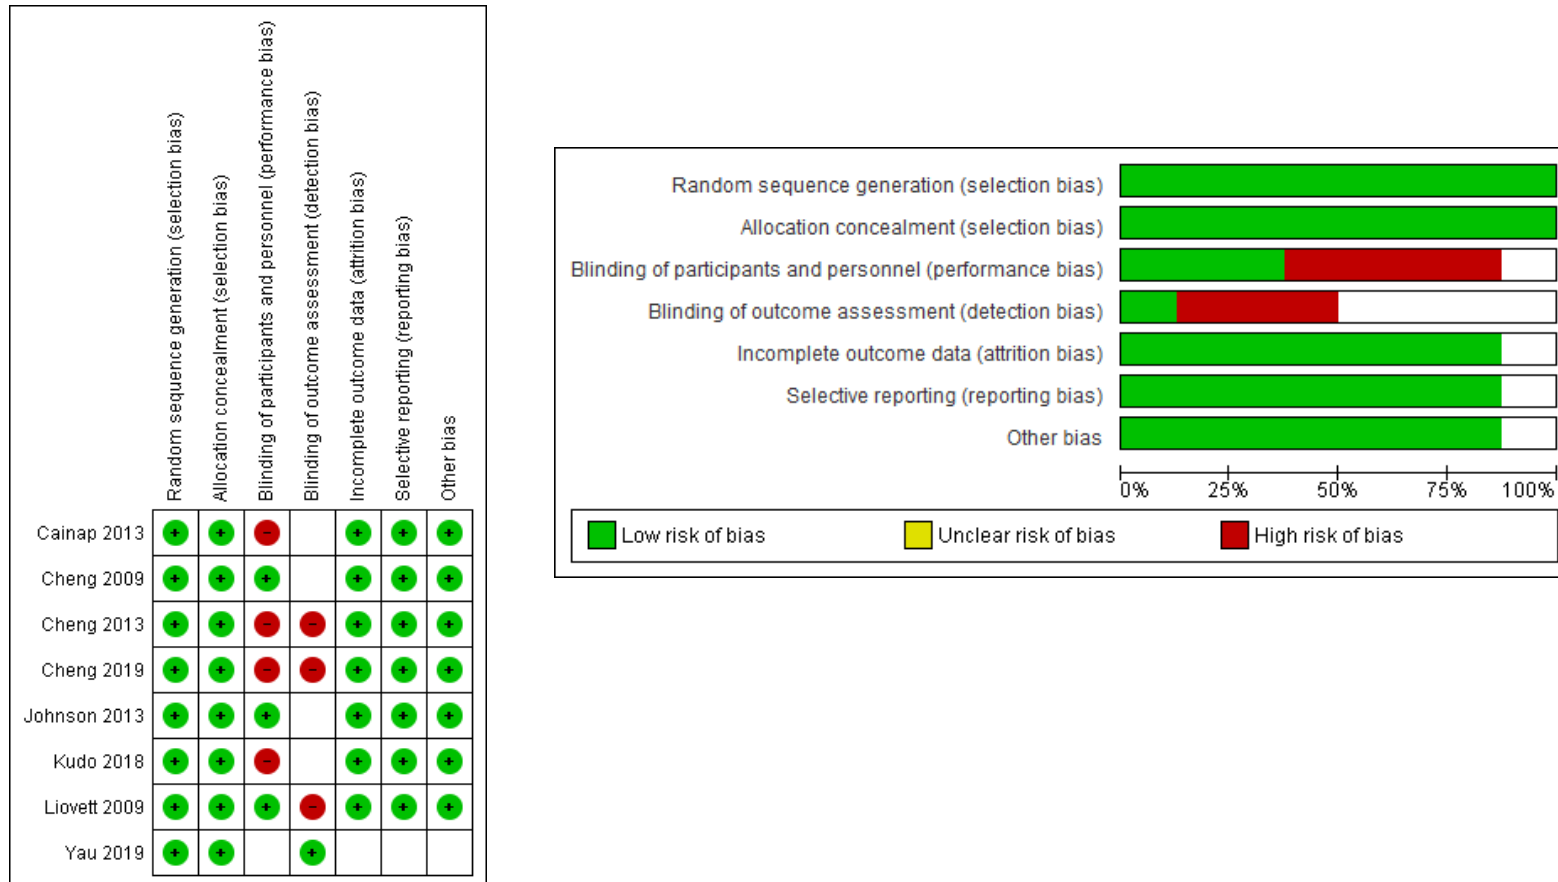

## eTable 4 GRADE

eTable 4a. Certainty of Evidence Table (GRADE). First line treatment - Overall survival

| Certainty assessment                           |                   |              |               |              |             |                      | № of patients |                          | Effect                           |                   | Certainty    |
|------------------------------------------------|-------------------|--------------|---------------|--------------|-------------|----------------------|---------------|--------------------------|----------------------------------|-------------------|--------------|
| № of studies                                   | Study design      | Risk of bias | Inconsistency | Indirectness | Imprecision | Other considerations | 1st line OS   | Risk of Death in Control | Relative (95% CI)                | Absolute (95% CI) |              |
| <b>AteBev vs Nivolumab - Overall survival</b>  |                   |              |               |              |             |                      |               |                          |                                  |                   |              |
| 2                                              | randomized trials | not serious  | not serious   | not serious  | not serious | none                 |               |                          | <b>HR 0.68</b><br>(0.48 to 0.98) |                   | ⊕⊕⊕⊕<br>HIGH |
| <b>AteBev vs Lenvatinib - Overall survival</b> |                   |              |               |              |             |                      |               |                          |                                  |                   |              |
| 2                                              | randomized trials | not serious  | not serious   | not serious  | not serious | none                 |               |                          | <b>HR 0.63</b><br>(0.44 to 0.89) |                   | ⊕⊕⊕⊕<br>HIGH |
| <b>AteBev vs Sorafenib - Overall survival</b>  |                   |              |               |              |             |                      |               |                          |                                  |                   |              |
| 7                                              | randomized trials | not serious  | not serious   | not serious  | not serious | none                 |               |                          | <b>HR 0.58</b><br>(0.42 to 0.80) |                   | ⊕⊕⊕⊕<br>HIGH |

| № of studies                                      | Study design      | Risk of bias | Certainty assessment |              |             |             | Other considerations | № of patients            |                                  | Effect                                                      |                  | Certainty |
|---------------------------------------------------|-------------------|--------------|----------------------|--------------|-------------|-------------|----------------------|--------------------------|----------------------------------|-------------------------------------------------------------|------------------|-----------|
|                                                   |                   |              | Inconsistency        | Indirectness | Imprecision | 1st line OS |                      | Risk of Death in Control | Relative (95% CI)                | Absolute (95% CI)                                           |                  |           |
| <b>AteBev vs Linifanib - Overall survival</b>     |                   |              |                      |              |             |             |                      |                          |                                  |                                                             |                  |           |
| 2                                                 | randomized trials | not serious  | not serious          | not serious  | not serious | none        |                      |                          | <b>HR 0.55</b><br>(0.39 to 0.78) |                                                             | ⊕⊕⊕⊕<br>HIGH     |           |
| <b>AteBev vs Sunitinib - Overall survival</b>     |                   |              |                      |              |             |             |                      |                          |                                  |                                                             |                  |           |
| 2                                                 | randomized trials | not serious  | not serious          | not serious  | not serious | none        |                      |                          | <b>HR 0.45</b><br>(0.32 to 0.63) |                                                             | ⊕⊕⊕⊕<br>HIGH     |           |
| <b>AteBev vs Placebo - Overall survival</b>       |                   |              |                      |              |             |             |                      |                          |                                  |                                                             |                  |           |
| 3                                                 | randomized trials | not serious  | not serious          | not serious  | not serious | none        |                      | 58.7% <sup>&amp;</sup>   | <b>HR 0.40</b><br>(0.28 to 0.56) | <b>289 fewer per 1,000</b><br>(from 368 fewer to 197 fewer) | ⊕⊕⊕⊕<br>HIGH     |           |
| <b>Nivolumab vs Lenvatinib - Overall survival</b> |                   |              |                      |              |             |             |                      |                          |                                  |                                                             |                  |           |
| 2                                                 | Randomized trials | not serious  | not serious          | not serious  | serious     | none        |                      |                          | <b>HR 0.92</b><br>(0.74 to 1.16) |                                                             | ⊕⊕⊕○<br>MODERATE |           |

| Certainty assessment                             |                   |              |               |              |             |                      | № of patients |                          | Effect                           |                                                             | Certainty        |
|--------------------------------------------------|-------------------|--------------|---------------|--------------|-------------|----------------------|---------------|--------------------------|----------------------------------|-------------------------------------------------------------|------------------|
| № of studies                                     | Study design      | Risk of bias | Inconsistency | Indirectness | Imprecision | Other considerations | 1st line OS   | Risk of Death in Control | Relative (95% CI)                | Absolute (95% CI)                                           |                  |
| <b>Nivolumab vs Sorafenib - Overall survival</b> |                   |              |               |              |             |                      |               |                          |                                  |                                                             |                  |
| 7                                                | Randomized trials | not serious  | not serious   | not serious  | serious     | none                 |               |                          | <b>HR 0.85</b><br>(0.71 to 1.01) |                                                             | ⊕⊕⊕○<br>MODERATE |
| <b>Nivolumab vs Linifanib - Overall survival</b> |                   |              |               |              |             |                      |               |                          |                                  |                                                             |                  |
| 2                                                | randomized trials | not serious  | not serious   | not serious  | serious     | none                 |               |                          | <b>HR 0.81</b><br>(0.64 to 1.02) |                                                             | ⊕⊕⊕○<br>MODERATE |
| <b>Nivolumab vs Sunitinib - Overall survival</b> |                   |              |               |              |             |                      |               |                          |                                  |                                                             |                  |
| 2                                                | randomized trials | not serious  | not serious   | not serious  | not serious | none                 |               |                          | <b>HR 0.65</b><br>(0.52 to 0.82) |                                                             | ⊕⊕⊕⊕<br>HIGH     |
| <b>Nivolumab vs Placebo - Overall survival</b>   |                   |              |               |              |             |                      |               |                          |                                  |                                                             |                  |
| 3                                                | randomized trials | not serious  | not serious   | not serious  | not serious | none                 |               | 58.7% <sup>&amp;</sup>   | <b>HR 0.59</b><br>(0.47 to 0.73) | <b>181 fewer per 1,000</b><br>(from 247 fewer to 111 fewer) | ⊕⊕⊕⊕<br>HIGH     |

| Certainty assessment                              |                   |              |               |              |             |                      | № of patients |                          | Effect                           |                                                            | Certainty        |
|---------------------------------------------------|-------------------|--------------|---------------|--------------|-------------|----------------------|---------------|--------------------------|----------------------------------|------------------------------------------------------------|------------------|
| № of studies                                      | Study design      | Risk of bias | Inconsistency | Indirectness | Imprecision | Other considerations | 1st line OS   | Risk of Death in Control | Relative (95% CI)                | Absolute (95% CI)                                          |                  |
| <b>Lenvatinib vs Sorafenib - Overall survival</b> |                   |              |               |              |             |                      |               |                          |                                  |                                                            |                  |
| 7                                                 | randomized trials | not serious  | not serious   | not serious  | serious     | none                 |               |                          | <b>HR 0.92</b><br>(0.79 to 1.07) |                                                            | ⊕⊕⊕○<br>MODERATE |
| <b>Lenvatinib vs Linifanib - Overall survival</b> |                   |              |               |              |             |                      |               |                          |                                  |                                                            |                  |
| 2                                                 | randomized trials | not serious  | not serious   | not serious  | serious     | none                 |               |                          | <b>HR 0.88</b><br>(0.71 to 1.08) |                                                            | ⊕⊕⊕○<br>MODERATE |
| <b>Lenvatinib vs Sunitinib - Overall survival</b> |                   |              |               |              |             |                      |               |                          |                                  |                                                            |                  |
| 2                                                 | randomized trials | not serious  | not serious   | not serious  | not serious | none                 |               |                          | <b>HR 0.71</b><br>(0.58 to 0.87) |                                                            | ⊕⊕⊕⊕<br>HIGH     |
| <b>Lenvatinib vs Placebo - Overall survival</b>   |                   |              |               |              |             |                      |               |                          |                                  |                                                            |                  |
| 3                                                 | randomized trials | not serious  | not serious   | not serious  | not serious | none                 |               | 58.7% <sup>&amp;</sup>   | <b>HR 0.63</b><br>(0.52 to 0.77) | <b>160 fewer per 1,000</b><br>(from 218 fewer to 93 fewer) | ⊕⊕⊕⊕<br>HIGH     |



| № of studies                                     | Study design      | Certainty assessment |               |              |             |                      | № of patients      |                          | Effect                           |                                                            | Certainty        |
|--------------------------------------------------|-------------------|----------------------|---------------|--------------|-------------|----------------------|--------------------|--------------------------|----------------------------------|------------------------------------------------------------|------------------|
|                                                  |                   | Risk of bias         | Inconsistency | Indirectness | Imprecision | Other considerations | 1st line OS        | Risk of Death in Control | Relative (95% CI)                | Absolute (95% CI)                                          |                  |
| <b>Sorafenib vs Linifanib - Overall survival</b> |                   |                      |               |              |             |                      |                    |                          |                                  |                                                            |                  |
| 7                                                | randomized trials | not serious          | not serious   | not serious  | serious     | none                 |                    |                          | <b>HR 0.95</b><br>(0.82 to 1.11) |                                                            | ⊕⊕⊕○<br>MODERATE |
| <b>Sorafenib vs Sunitinib - Overall survival</b> |                   |                      |               |              |             |                      |                    |                          |                                  |                                                            |                  |
| 7                                                | randomized trials | not serious          | not serious   | not serious  | not serious | none                 |                    |                          | <b>HR 0.77</b><br>(0.67 to 0.89) |                                                            | ⊕⊕⊕⊕<br>HIGH     |
| <b>Sorafenib vs Placebo - Overall survival</b>   |                   |                      |               |              |             |                      |                    |                          |                                  |                                                            |                  |
| 7                                                | randomized trials | not serious          | not serious   | not serious  | not serious | none                 | 143/299<br>(47.8%) | 178/303<br>(58.7%)       | <b>HR 0.69</b><br>(0.61 to 0.78) | <b>130 fewer per 1,000</b><br>(from 170 fewer to 89 fewer) | ⊕⊕⊕⊕<br>HIGH     |
| <b>Linifanib vs Sunitinib - Overall survival</b> |                   |                      |               |              |             |                      |                    |                          |                                  |                                                            |                  |
| 2                                                | randomized trials | not serious          | not serious   | not serious  | not serious | none                 |                    |                          | <b>HR 0.81</b><br>(0.66 to 0.99) |                                                            | ⊕⊕⊕⊕<br>HIGH     |

| № of studies                                   | Study design      | Risk of bias | Certainty assessment |              |             |             | Other considerations | № of patients            |                                  | Effect                                                     |                   | Certainty |
|------------------------------------------------|-------------------|--------------|----------------------|--------------|-------------|-------------|----------------------|--------------------------|----------------------------------|------------------------------------------------------------|-------------------|-----------|
|                                                |                   |              | Inconsistency        | Indirectness | Imprecision | 1st line OS |                      | Risk of Death in Control | Relative (95% CI)                | Absolute (95% CI)                                          |                   |           |
| <b>Linifanib vs Placebo - Overall survival</b> |                   |              |                      |              |             |             |                      |                          |                                  |                                                            |                   |           |
| 3                                              | randomized trials | not serious  | not serious          | not serious  | not serious | none        |                      | 58.7% <sup>&amp;</sup>   | <b>HR 0.72</b><br>(0.59 to 0.88) | <b>116 fewer per 1,000</b><br>(from 181 fewer to 46 fewer) | ⊕⊕⊕⊕<br>HIGH      |           |
| <b>Sunitinib vs Placebo - Overall survival</b> |                   |              |                      |              |             |             |                      |                          |                                  |                                                            |                   |           |
| 3                                              | randomized trials | not serious  | not serious          | not serious  | serious     | none        |                      | 58.7% <sup>&amp;</sup>   | <b>HR 0.89</b><br>(0.74 to 1.08) | <b>42 fewer per 1,000</b><br>(from 107 fewer to 28 more)   | s⊕⊕⊕○<br>MODERATE |           |

**CI:** Confidence interval; **HR:** Hazard Ratio

\*Although risk of bias is moderate for the included studies due to lack of blinding of outcome assessments, but the outcome of overall survival is independent of blinded assessment.

\*\*Confidence intervals include appreciable benefits and harms

<sup>&</sup> Baseline risk of death based on SHARP trial. Risk of death in other placebos is assumed to be similar to SHARP trial due to lack of head to head comparison between other agents and placebo.

eTable 4b. Certainty of Evidence Table (GRADE). First line treatment – Progression Free survival

| № of studies                                               | Study design      | Certainty assessment |               |              |             |              | Other considerations             | Effect           | Certainty |
|------------------------------------------------------------|-------------------|----------------------|---------------|--------------|-------------|--------------|----------------------------------|------------------|-----------|
|                                                            |                   | Risk of bias*        | Inconsistency | Indirectness | Imprecision | HR† (95% CI) |                                  |                  |           |
| <b>AteBev vs Lenvatinib - Progression free survival</b>    |                   |                      |               |              |             |              |                                  |                  |           |
| Network meta-analysis (2 trials)                           | randomized trials | not serious          | not serious   | not serious  | serious**   | none         | <b>HR 0.89</b><br>(0.67 to 1.19) | ⊕⊕⊕○<br>MODERATE |           |
| <b>AteBev vs Linifanib - Progression free survival</b>     |                   |                      |               |              |             |              |                                  |                  |           |
| Network meta-analysis (2 trials)                           | randomized trials | not serious          | not serious   | not serious  | not serious | none         | <b>HR 0.73</b><br>(0.55 to 0.97) | ⊕⊕⊕⊕<br>HIGH     |           |
| <b>AteBev vs Sorafenib - Progression free survival</b>     |                   |                      |               |              |             |              |                                  |                  |           |
| Network meta-analysis (4 trials)                           | randomized trials | not serious          | not serious   | not serious  | not serious | none         | <b>HR 0.59</b><br>(0.46 to 0.75) | ⊕⊕⊕⊕<br>HIGH     |           |
| <b>AteBev vs Sunitinib - Progression free survival</b>     |                   |                      |               |              |             |              |                                  |                  |           |
| Network meta-analysis (2 trials)                           | randomized trials | not serious          | not serious   | not serious  | not serious | none         | <b>HR 0.52</b><br>(0.40 to 0.69) | ⊕⊕⊕⊕<br>HIGH     |           |
| <b>Lenvatinib vs Linifanib - Progression free survival</b> |                   |                      |               |              |             |              |                                  |                  |           |
| Network meta-analysis (2 trials)                           | randomized trials | not serious          | not serious   | not serious  | serious**   | none         | <b>HR 0.81</b><br>(0.66 to 1.01) | ⊕⊕⊕○<br>MODERATE |           |
| <b>Lenvatinib vs Sorafenib - Progression free survival</b> |                   |                      |               |              |             |              |                                  |                  |           |
| Network meta-analysis (4 trials)                           | randomized trials | not serious          | not serious   | not serious  | not serious | none         | <b>HR 0.66</b><br>(0.57 to 0.77) | ⊕⊕⊕⊕<br>HIGH     |           |
| <b>Lenvatinib vs Sunitinib - Progression free survival</b> |                   |                      |               |              |             |              |                                  |                  |           |
| Network meta-analysis (2 trials)                           | randomized trials | not serious          | not serious   | not serious  | not serious | none         | <b>HR 0.58</b><br>(0.48 to 0.72) | ⊕⊕⊕⊕<br>HIGH     |           |

| № of studies                                              | Study design      | Certainty assessment |               |              |             |                 | Other considerations             | Effect           | Certainty |
|-----------------------------------------------------------|-------------------|----------------------|---------------|--------------|-------------|-----------------|----------------------------------|------------------|-----------|
|                                                           |                   | Risk of bias*        | Inconsistency | Indirectness | Imprecision | HR†<br>(95% CI) |                                  |                  |           |
| <b>Linifanib vs Sorafenib - Progression free survival</b> |                   |                      |               |              |             |                 |                                  |                  |           |
| Network meta-analysis (4 trials)                          | randomized trials | not serious          | not serious   | not serious  | not serious | none            | <b>HR 0.81</b><br>(0.70 to 0.94) | ⊕⊕⊕⊕<br>HIGH     |           |
| <b>Linifanib vs Sunitinib - Progression free survival</b> |                   |                      |               |              |             |                 |                                  |                  |           |
| Network meta-analysis (2 trials)                          | randomized trials | not serious          | not serious   | not serious  | not serious | none            | <b>HR 0.72</b><br>(0.58 to 0.88) | ⊕⊕⊕⊕<br>HIGH     |           |
| <b>Sorafenib vs Sunitinib - Progression free survival</b> |                   |                      |               |              |             |                 |                                  |                  |           |
| Network meta-analysis (4 trials)                          | randomized trials | not serious          | not serious   | not serious  | serious**   | none            | <b>HR 0.88</b><br>(0.77 to 1.01) | ⊕⊕⊕○<br>MODERATE |           |

**CI:** Confidence interval; **HR:** Hazard Ratio

\*Although risk of bias is moderate for the included studies due to lack of blinding of outcome assessments, but the outcome of overall survival is independent of blinded assessment.

\*\*Confidence intervals include appreciable benefits and harms

†Insufficient data to estimate absolute effects

**eFigure 5: Network plot for overall-survival (left) and progression-free survival (right) for second-line trials:** The thickness of the connecting line corresponds to the number of trials between comparators.

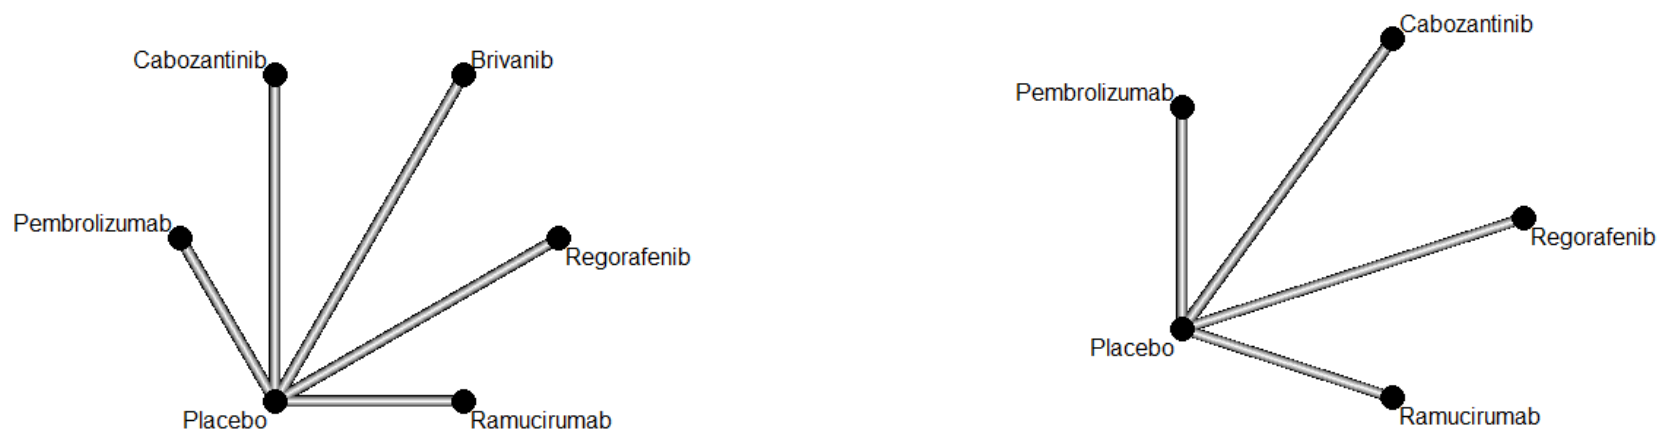

**eTable5: Ranking of second-line treatments for overall survival (left) and progression-free survival (right) based on P-score**

| Ranking - OS       |         |  |  | Ranking - PFS      |         |
|--------------------|---------|--|--|--------------------|---------|
| 2nd line treatment | P-score |  |  | 2nd line treatment | P-score |
| Regorafenib        | 0.9673  |  |  | Cabozantinib       | 0.9045  |
| Cabozantinib       | 0.662   |  |  | Regorafenib        | 0.8393  |
| Pembrolizumab      | 0.5998  |  |  | Ramucirumab        | 0.4659  |
| Ramucirumab        | 0.3793  |  |  | Pembrolizumab      | 0.2897  |
| Brivanib           | 0.3344  |  |  | Placebo            | 0.0006  |
| Placebo            | 0.0572  |  |  |                    |         |

**eFigure6: Ranking of 2<sup>nd</sup> line treatments for overall survival**

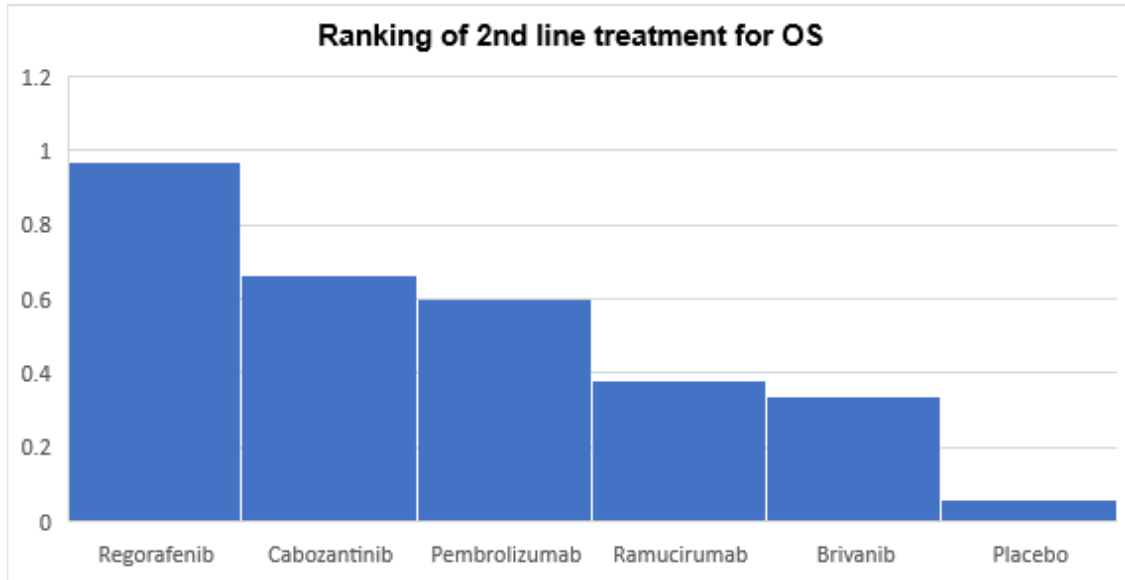

**eFigure7: Ranking of 2<sup>nd</sup> line treatments for progression-free survival**

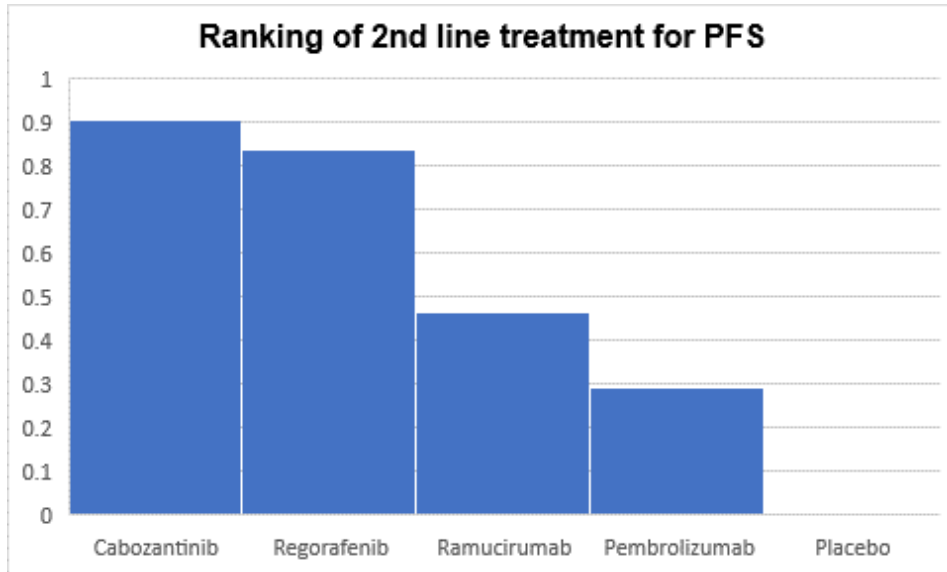



**eFigure8: Network plot for AFP $\geq$  400 subgroup analysis: The thickness of the connecting line corresponds to the number of trials between comparators.**

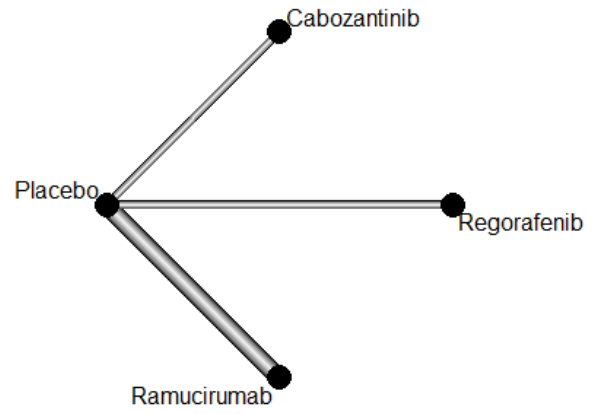

**eTable 6: League table showing indirect comparisons among AFP $\geq$  400 subgroup analysis**

A. Overall survival

| League table showing indirect comparisons - overall survival (> 400 AFP) |                   |                   |                   |         |
|--------------------------------------------------------------------------|-------------------|-------------------|-------------------|---------|
| Comparator                                                               | Treatment         |                   |                   |         |
|                                                                          | Regorafenib       |                   |                   |         |
|                                                                          | 0.99 (0.68; 1.42) | Ramucirumab       |                   |         |
|                                                                          | 0.96 (0.63; 1.45) | 0.97 (0.69; 1.37) | Cabozantinib      |         |
|                                                                          | 0.68 (0.50; 0.92) | 0.69 (0.56; 0.84) | 0.71 (0.54; 0.94) | Placebo |

B. Progression-free survival

| League table showing indirect comparisons - progression free survival (> 400 AFP) |                   |                   |                   |         |
|-----------------------------------------------------------------------------------|-------------------|-------------------|-------------------|---------|
| Comparator                                                                        | Treatment         |                   |                   |         |
|                                                                                   | Cabozantinib      |                   |                   |         |
|                                                                                   | 0.79 (0.34; 1.87) | Regorafenib       |                   |         |
|                                                                                   | 0.75 (0.35; 1.57) | 0.94 (0.45; 1.99) | Ramucirumab       |         |
|                                                                                   | 0.42 (0.23; 0.77) | 0.53 (0.29; 0.97) | 0.56 (0.37; 0.87) | Placebo |

**eTable 7: Ranking of AFP $\geq$  400 subgroup analysis for overall survival (left) and progression-free survival (right) based on P-score**

| <b>Ranking - OS in &gt;400 AFP subgroup</b> |                | <b>Ranking - PFS in &gt;400 AFP subgroup</b> |                |
|---------------------------------------------|----------------|----------------------------------------------|----------------|
| <b>2nd line treatment</b>                   | <b>P-score</b> | <b>2nd line treatment</b>                    | <b>P-score</b> |
| Regorafenib                                 | 0.7015         | Cabozantinib                                 | 0.8269         |
| Ramucirumab                                 | 0.6788         | Regorafenib                                  | 0.6136         |
| Cabozantinib                                | 0.6148         | Ramucirumab                                  | 0.5503         |
| Placebo                                     | 0.0048         | Placebo                                      | 0.0092         |

**eFigure9: Ranking of AFP $\geq$  400 subgroup analysis for overall survival**

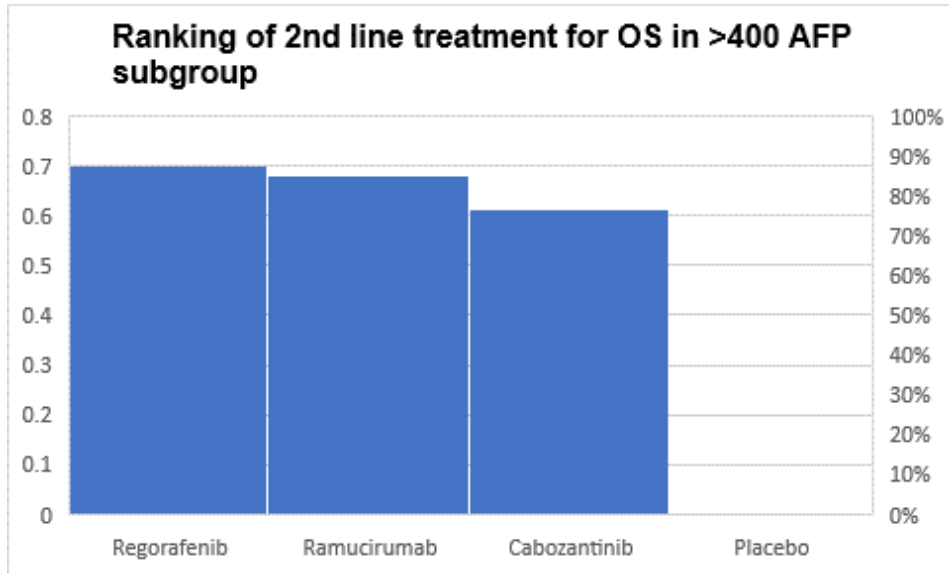

**eFigure10: Ranking of AFP $\geq$  400 subgroup analysis for progression-free survival**

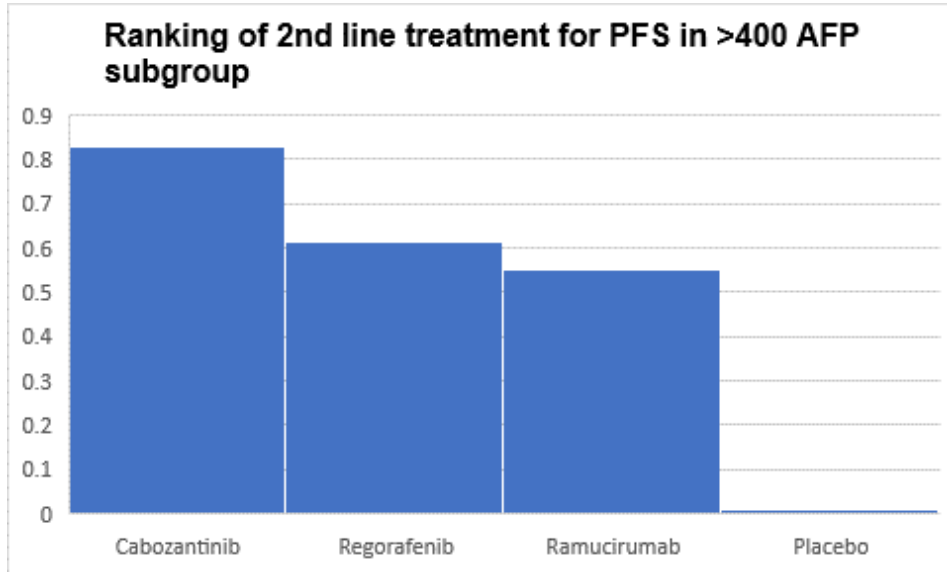

**eFigure11:**

Risk of bias graph for second-line trials: review authors' judgements about each risk of bias item presented as percentages across all included studies.

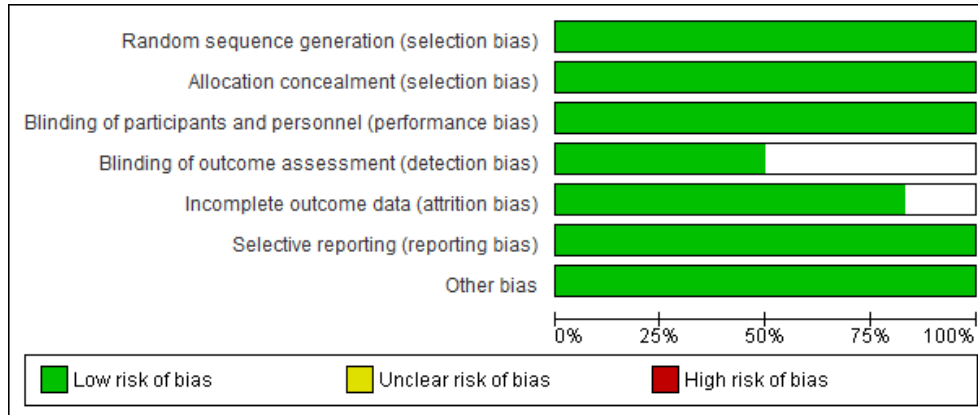

|               | Random sequence generation (selection bias) | Allocation concealment (selection bias) | Blinding of participants and personnel (performance bias) | Blinding of outcome assessment (detection bias) | Incomplete outcome data (attrition bias) | Selective reporting (reporting bias) | Other bias |
|---------------|---------------------------------------------|-----------------------------------------|-----------------------------------------------------------|-------------------------------------------------|------------------------------------------|--------------------------------------|------------|
| Abu Alfa 2018 | +                                           | +                                       | +                                                         |                                                 | +                                        | +                                    | +          |
| Bruix 2018    | +                                           | +                                       | +                                                         |                                                 | +                                        | +                                    | +          |
| Finn 2020     | +                                           | +                                       | +                                                         | +                                               | +                                        | +                                    | +          |
| Liovet 2013   | +                                           | +                                       | +                                                         | +                                               | +                                        | +                                    | +          |
| Zhu 2015      | +                                           | +                                       | +                                                         |                                                 | +                                        | +                                    | +          |
| Zhu 2019      | +                                           | +                                       | +                                                         | +                                               |                                          | +                                    | +          |

reserved.

**eTable 8A: Certainty of Evidence Table (GRADE). Second line treatment - Overall survival**

:

| № of studies                                           | Study design      | Risk of bias | Certainty assessment |              |             |                      | № of patients |  | Effect                           |                   | Certainty        |
|--------------------------------------------------------|-------------------|--------------|----------------------|--------------|-------------|----------------------|---------------|--|----------------------------------|-------------------|------------------|
|                                                        |                   |              | Inconsistency        | Indirectness | Imprecision | Other considerations | 2nd line OS   |  | Relative (95% CI)                | Absolute (95% CI) |                  |
| <b>Regorafenib vs Cabozantinib - Overall survival</b>  |                   |              |                      |              |             |                      |               |  |                                  |                   |                  |
| 2                                                      | randomized trials | not serious  | not serious          | not serious  | serious     | none                 |               |  | <b>HR 0.82</b><br>(0.62 to 1.07) |                   | ⊕⊕⊕○<br>MODERATE |
| <b>Regorafenib vs Pembrolizumab - Overall survival</b> |                   |              |                      |              |             |                      |               |  |                                  |                   |                  |
| 2                                                      | randomized trials | not serious  | not serious          | not serious  | serious     | none                 |               |  | <b>HR 0.79</b><br>(0.58 to 1.08) |                   | ⊕⊕⊕○<br>MODERATE |
| <b>Regorafenib vs Ramucirumab - Overall survival</b>   |                   |              |                      |              |             |                      |               |  |                                  |                   |                  |
| 2                                                      | randomized trials | not serious  | not serious          | not serious  | not serious | none                 |               |  | <b>HR 0.71</b><br>(0.54 to 0.93) |                   | ⊕⊕⊕⊕<br>HIGH     |
| <b>Regorafenib vs Brivanib - Overall survival</b>      |                   |              |                      |              |             |                      |               |  |                                  |                   |                  |

| № of studies                                            | Study design      | Risk of bias | Certainty assessment |              |             |      | Other considerations | № of patients      |                                  | Effect                                                     |                   | Certainty |
|---------------------------------------------------------|-------------------|--------------|----------------------|--------------|-------------|------|----------------------|--------------------|----------------------------------|------------------------------------------------------------|-------------------|-----------|
|                                                         |                   |              | Inconsistency        | Indirectness | Imprecision |      |                      | 2nd line OS        |                                  | Relative (95% CI)                                          | Absolute (95% CI) |           |
| 2                                                       | randomized trials | not serious  | not serious          | not serious  | not serious | none |                      |                    | <b>HR 0.70</b><br>(0.51 to 0.96) |                                                            | ⊕⊕⊕⊕<br>HIGH      |           |
| <b>Regorafenib vs Placebo - Overall survival</b>        |                   |              |                      |              |             |      |                      |                    |                                  |                                                            |                   |           |
| 5                                                       | randomized trials | not serious  | not serious          | not serious  | not serious | none | 317/379<br>(83.6%)   | 174/194<br>(89.7%) | <b>HR 0.62</b><br>(0.51 to 0.75) | <b>141 fewer per 1,000</b><br>(from 211 fewer to 79 fewer) | ⊕⊕⊕⊕<br>HIGH      |           |
| <b>Cabozantinib vs Pembrolizumab - Overall survival</b> |                   |              |                      |              |             |      |                      |                    |                                  |                                                            |                   |           |
| 2                                                       | randomized trials | not serious  | not serious          | not serious  | serious     | none |                      |                    | <b>HR 0.97</b><br>(0.71 to 1.33) |                                                            | ⊕⊕⊕○<br>MODERATE  |           |
| <b>Cabozantinib vs Ramucirumab - Overall survival</b>   |                   |              |                      |              |             |      |                      |                    |                                  |                                                            |                   |           |
| 2                                                       | randomized trials | not serious  | not serious          | not serious  | serious     | none |                      |                    | <b>HR 0.87</b><br>(0.67 to 1.14) |                                                            | ⊕⊕⊕○<br>MODERATE  |           |
| <b>Cabozantinib vs Brivanib - Overall survival</b>      |                   |              |                      |              |             |      |                      |                    |                                  |                                                            |                   |           |



| № of studies                                           | Study design      | Risk of bias | Certainty assessment |              |             |      | Other considerations | № of patients      |                                  | Effect                                                     |                   | Certainty |
|--------------------------------------------------------|-------------------|--------------|----------------------|--------------|-------------|------|----------------------|--------------------|----------------------------------|------------------------------------------------------------|-------------------|-----------|
|                                                        |                   |              | Inconsistency        | Indirectness | Imprecision |      |                      | 2nd line OS        |                                  | Relative (95% CI)                                          | Absolute (95% CI) |           |
| 2                                                      | randomized trials | not serious  | not serious          | not serious  | serious     | none |                      |                    | <b>HR 0.85</b><br>(0.62 to 1.17) |                                                            | ⊕⊕⊕○<br>MODERATE  |           |
| <b>Cabozantinib vs Placebo - Overall survival</b>      |                   |              |                      |              |             |      |                      |                    |                                  |                                                            |                   |           |
| 5                                                      | randomized trials | not serious  | not serious          | not serious  | not serious | none | 317/470<br>(67.4%)   | 167/237<br>(70.5%) | <b>HR 0.76</b><br>(0.63 to 0.92) | <b>100 fewer per 1,000</b><br>(from 168 fewer to 30 fewer) | ⊕⊕⊕⊕<br>HIGH      |           |
| <b>Pembrolizumab vs Ramucirumab - Overall survival</b> |                   |              |                      |              |             |      |                      |                    |                                  |                                                            |                   |           |
| 2                                                      | randomized trials | not serious  | not serious          | not serious  | serious     | none |                      |                    | <b>HR 0.90</b><br>(0.66 to 1.22) |                                                            | ⊕⊕⊕○<br>MODERATE  |           |
| <b>Pembrolizumab vs Brivanib - Overall survival</b>    |                   |              |                      |              |             |      |                      |                    |                                  |                                                            |                   |           |
| 2                                                      | randomized trials | not serious  | not serious          | not serious  | serious     | none |                      |                    | <b>HR 0.88</b><br>(0.62 to 1.25) |                                                            | ⊕⊕⊕○<br>MODERATE  |           |
| <b>Pembrolizumab vs Placebo - Overall survival</b>     |                   |              |                      |              |             |      |                      |                    |                                  |                                                            |                   |           |

| № of studies                                      | Study design      | Risk of bias | Certainty assessment |              |             |                      | № of patients   |                   | Effect                           |                                                          | Certainty        |
|---------------------------------------------------|-------------------|--------------|----------------------|--------------|-------------|----------------------|-----------------|-------------------|----------------------------------|----------------------------------------------------------|------------------|
|                                                   |                   |              | Inconsistency        | Indirectness | Imprecision | Other considerations | 2nd line OS     | Relative (95% CI) | Absolute (95% CI)                |                                                          |                  |
| 5                                                 | randomized trials | not serious  | not serious          | not serious  | serious     | none                 | 180/278 (64.7%) | 101/135 (74.8%)   | <b>HR 0.78</b><br>(0.61 to 1.00) | <b>89 fewer per 1,000</b><br>(from 179 fewer to 0 fewer) | ⊕⊕⊕○<br>MODERATE |
| <b>Ramucirumab vs Brivanib - Overall survival</b> |                   |              |                      |              |             |                      |                 |                   |                                  |                                                          |                  |
| 2                                                 | randomized trials | not serious  | not serious          | not serious  | serious     | none                 |                 |                   | <b>HR 0.98</b><br>(0.71 to 1.34) |                                                          | ⊕⊕⊕○<br>MODERATE |
| <b>Ramucirumab vs Placebo - Overall survival</b>  |                   |              |                      |              |             |                      |                 |                   |                                  |                                                          |                  |
| 5                                                 | randomized trials | not serious  | not serious          | not serious  | serious     | none                 | 240/283 (84.8%) | 263/282 (93.3%)   | <b>HR 0.87</b><br>(0.72 to 1.05) | <b>28 fewer per 1,000</b><br>(from 76 fewer to 9 more)   | ⊕⊕⊕○<br>MODERATE |
| <b>Brivanib vs Placebo - Overall survival</b>     |                   |              |                      |              |             |                      |                 |                   |                                  |                                                          |                  |
| 5                                                 | randomized trials | not serious  | not serious          | not serious  | serious     | none                 | 183/263 (69.6%) | 101/132 (76.5%)   | <b>HR 0.89</b><br>(0.69 to 1.15) | <b>41 fewer per 1,000</b><br>(from 133 fewer to 46 more) | ⊕⊕⊕○<br>MODERATE |

**CI:** Confidence interval; **HR:** Hazard Ratio

\*Confidence intervals include appreciable benefits and harms

eTable 8b. Certainty of Evidence Table (GRADE). Second line treatment – Progression free survival

| № of studies                                                     | Study design      | Certainty assessment |               |              |             |               | Other considerations             | Effect           | Certainty |
|------------------------------------------------------------------|-------------------|----------------------|---------------|--------------|-------------|---------------|----------------------------------|------------------|-----------|
|                                                                  |                   | Risk of bias         | Inconsistency | Indirectness | Imprecision | HR** (95% CI) |                                  |                  |           |
| <b>Cabozantinib vs Regorafenib - Progression free survival</b>   |                   |                      |               |              |             |               |                                  |                  |           |
| Network meta-analysis (2 trials)                                 | randomized trials | not serious          | not serious   | not serious  | serious*    | none          | <b>HR 0.96</b><br>(0.73 to 1.26) | ⊕⊕⊕○<br>MODERATE |           |
| <b>Cabozantinib vs Ramucirumab - Progression free survival</b>   |                   |                      |               |              |             |               |                                  |                  |           |
| Network meta-analysis (2 trials)                                 | randomized trials | not serious          | not serious   | not serious  | not serious | none          | <b>HR 0.71</b><br>(0.55 to 0.92) | ⊕⊕⊕⊕<br>HIGH     |           |
| <b>Cabozantinib vs Pembrolizumab - Progression free survival</b> |                   |                      |               |              |             |               |                                  |                  |           |
| Network meta-analysis (2 trials)                                 | randomized trials | not serious          | not serious   | not serious  | not serious | none          | <b>HR 0.61</b><br>(0.46 to 0.82) | ⊕⊕⊕⊕<br>HIGH     |           |
| <b>Cabozantinib vs Placebo - Progression free survival</b>       |                   |                      |               |              |             |               |                                  |                  |           |
| Network meta-analysis (4 trials)                                 | randomized trials | not serious          | not serious   | not serious  | not serious | none          | <b>HR 0.44</b><br>(0.37 to 0.53) | ⊕⊕⊕⊕<br>HIGH     |           |
| <b>Regorafenib vs Ramucirumab - Progression free survival</b>    |                   |                      |               |              |             |               |                                  |                  |           |
| Network meta-analysis (2 trials)                                 | randomized trials | not serious          | not serious   | not serious  | not serious | none          | <b>HR 0.74</b><br>(0.56 to 0.98) | ⊕⊕⊕⊕<br>HIGH     |           |
| <b>Regorafenib vs Pembrolizumab - Progression free survival</b>  |                   |                      |               |              |             |               |                                  |                  |           |
| Network meta-analysis (2 trials)                                 | randomized trials | not serious          | not serious   | not serious  | not serious | none          | <b>HR 0.64</b><br>(0.47 to 0.87) | ⊕⊕⊕⊕<br>HIGH     |           |
| <b>Regorafenib vs Placebo - Progression free survival</b>        |                   |                      |               |              |             |               |                                  |                  |           |
| Network meta-analysis (4 trials)                                 | randomized trials | not serious          | not serious   | not serious  | not serious | none          | <b>HR 0.46</b><br>(0.37 to 0.57) | ⊕⊕⊕⊕<br>HIGH     |           |
| <b>Ramucirumab vs Pembrolizumab - Progression free survival</b>  |                   |                      |               |              |             |               |                                  |                  |           |
| Network meta-analysis (2 trials)                                 | randomized trials | not serious          | not serious   | not serious  | serious*    | none          | <b>HR 0.86</b><br>(0.64 to 1.15) | ⊕⊕⊕○<br>MODERATE |           |
| <b>Ramucirumab vs Placebo - Progression free survival</b>        |                   |                      |               |              |             |               |                                  |                  |           |

| № of studies                                                | Study design      | Certainty assessment |               |              |             |                  | Other considerations             | Effect       | Certainty |
|-------------------------------------------------------------|-------------------|----------------------|---------------|--------------|-------------|------------------|----------------------------------|--------------|-----------|
|                                                             |                   | Risk of bias         | Inconsistency | Indirectness | Imprecision | HR**<br>(95% CI) |                                  |              |           |
| Network meta-analysis (4 trials)                            | randomized trials | not serious          | not serious   | not serious  | not serious | none             | <b>HR 0.62</b><br>(0.52 to 0.74) | ⊕⊕⊕⊕<br>HIGH |           |
| <b>Pembrolizumab vs Placebo - Progression free survival</b> |                   |                      |               |              |             |                  |                                  |              |           |
| Network meta-analysis (4 trials)                            | randomized trials | not serious          | not serious   | not serious  | not serious | none             | <b>HR 0.72</b><br>(0.57 to 0.90) | ⊕⊕⊕⊕<br>HIGH |           |

**CI:** Confidence interval; **HR:** Hazard Ratio

\*Confidence intervals include appreciable benefits and harms

\*\*Insufficient data to estimate absolute effects

**eFigure 12: forest plot of Frequentist network meta-analysis using random-effects model for overall survival (OS) (left) and progression-free survival (PFS) (right) in 1<sup>st</sup> line of treatment**

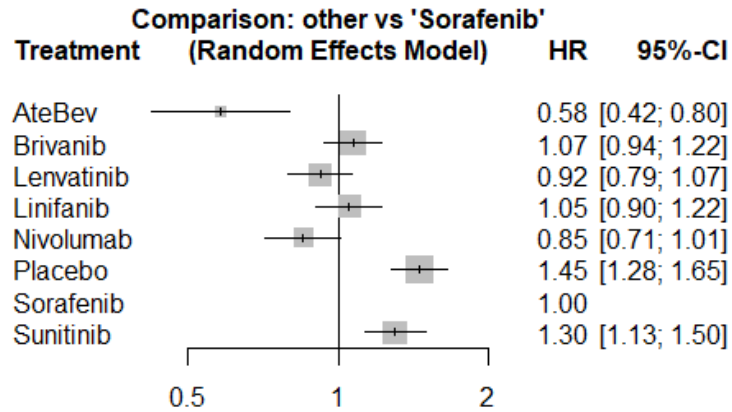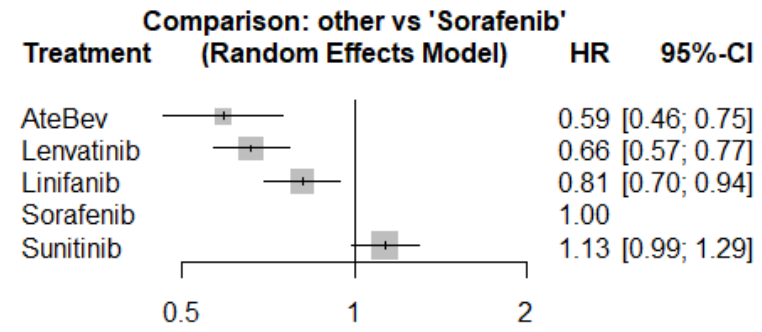

**eFigure 13: Figure showing forest plot of Frequentist network meta-analysis using random-effects model for overall survival (OS) (left) and progression-free survival (PFS) (right) in 2nd line of treatment**

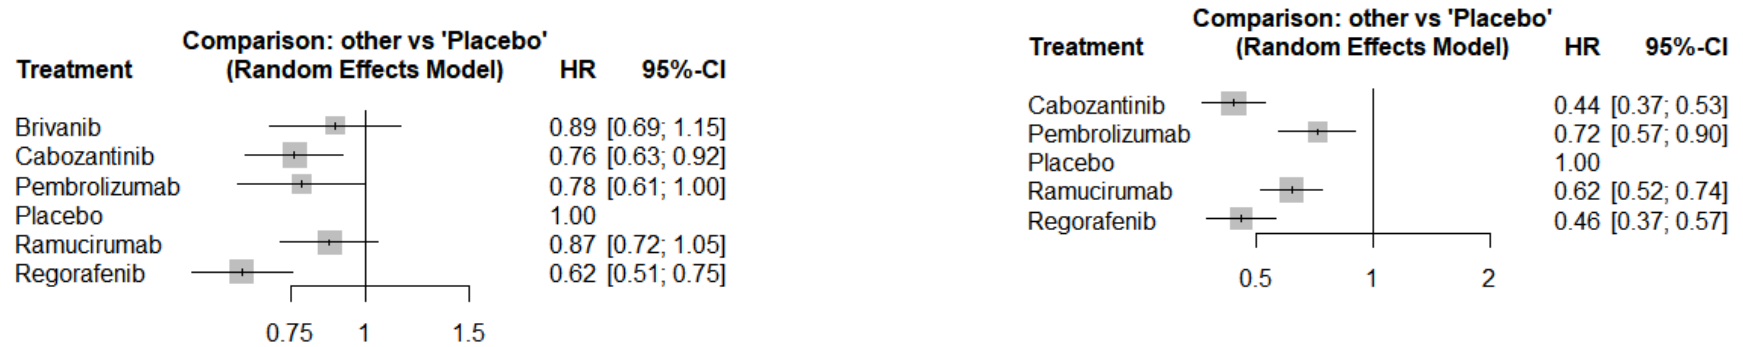

**eFigure 14: Figure showing forest plot of Frequentist network meta-analysis using random-effects model for overall survival (OS) (left) and progression free survival (PFS) (right) in 2<sup>nd</sup> line of treatment for subgroup  $\geq 400$  AFP**

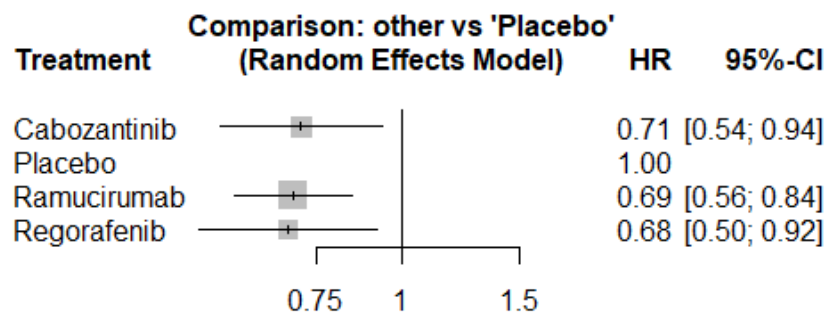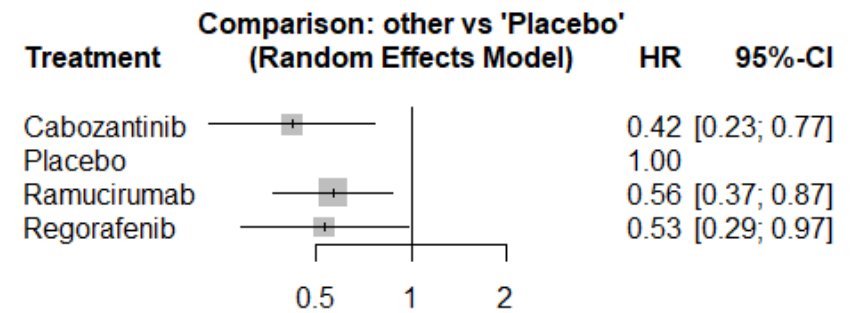

Supplement: jamaoncol-e204930-s001.pdf [file jamaoncol-e204930-s001.pdf]
